# Supplementary material for: Population-Based Analysis of Invasive Nontypeable Pneumococci Reveals That Most Have Defective Capsule Synthesis Genes
Source: PLoS One. 2014 May 15;9(5):e97825. doi: 10.1371/journal.pone.0097825 (PMC4022640; doi:10.1371/journal.pone.0097825)
Supplement: Table S1 — Primers used in this study. (DOCX) [file pone.0097825.s001.docx]

**Table S1. Primers used in this study.**

| **Primer** | **Sequence (5'-3')a** | **Sourceb** |
| --- | --- | --- |
| *Forward Primers* | |  |
| 5114 | TTAGTGACGGAGGCAGGTGAA | [[1](#_ENREF_1)] |
| 5202 | CAACCGTACAGAATGAAGCGG | [[2](#_ENREF_2)] |
| 5419 | TCTTAGTTCCATGGGATGCTTTCTGTGTG | *dexB,* [[3](#_ENREF_3)] |
| 5511 | AACCTCAACTATTTGACAACTGCTA | 7236-073553-3577 |
| 5694 | GGGAACGACTATCCTGTTGGAAATC | [[4](#_ENREF_4)] |
| 5815 | GAGGACTTTCTTTTTAGTATAATAAAGTTAG | 7236-07872-902 |
| 5816 | TATGCGATAGCAGTCCAAGG | 7236-071836-1855 |
| 5817 | ACGCTTTTCTTCCAGGTGG | 7236-072805-2823 |
| 5825 | GATGCAGATAGTGAAAAAAAAGGTG | ST82105-2129 |
| 5826 | CATCGAGTTAGAGTATCCAGAC | ST82761-2782 |
| 5827 | GATTTAGTGAATACTCAGTTGGAAAG | ST83446-3471 |
| 5828 | CAAGTAAATAGTTCACATGTCCTC | ST84116-4139 |
| 5829 | CCAGCAAAAACGTTAGCTAGC | ST84685-4705 |
| 5830 | CGTTCCAGATTTGGACAAAATG | ST85041-5062 |
| 5831 | CAGTAAACAAATACGGTTCTTATGG | ST85709-5733 |
| 5832 | GAGAGCTTGTCTCTCAGTTTG | ST86404-6424 |
| 5833 | GGACAATCTGGAAAGATATTGAAATC | ST87076-7101 |
| 5834 | GTGTTTGCTCAGATTGGAGC | ST87730-7749 |
| 5835 | CGACAATACATAGATAGTCTTTG | ST88090-8112 |
| 5836 | GCATTTGACAATGGCTGGAG | ST88743-8762 |
| 5837 | GTCAGACTGTCAGAGAATTGTTAG | ST89428-9451 |
| 5838 | ATTGCGGGTAGGAATTACTTAG | ST810135-10156 |
| 5839 | GGAAATGGGCATTTGCATCG | ST810838-10857 |
| 5840 | GAGGAAAATAACCAATGCCGTATC | ST811361-11384 |
| 5841 | GCTCTACTAGTATCTATAGTAATTTTTG | ST811996-12023 |
| 5842 | CATTGCGGTTTTATTGGCTCAG | ST812648-12669 |
| 5843 | CTCAAGCTATTATTGATGGAGTTGG | ST813298-13322 |
| cpsA-f | GCAGTACAGCAGTTTGTTGGACTGACC | [[2](#_ENREF_2)] |
| *Reverse Primers* | |  |
| 3202 | GAATATTTTCATTATCAGTCCCAGTC | [[2](#_ENREF_2),[4](#_ENREF_4)] |
| 3419 | CGCTGAACTTTTGTAGTTGCTGTCTGGTCAAC | *aliA*, [[3](#_ENREF_3)] |
| 3694 | CTTCTGTTGATTCCGTCCTCGATC | [[4](#_ENREF_4)] |
| 3695 | CTTAATCTCACTTCGTCCACTGACC | ST87029-7005 |
| 3753 | TTGGTTTTCGGAACTTTGAAAACTTC | 7236-07245-220 |
| 3754 | ACTTGTTCACGAAGAAGGGC | 7236-071004-985 |
| 3755 | TCACATGCGCCCAACATC | 7236-071955-1938 |
| 3756 | CTCAAATTGTCTAGTCTCTATGC | 7236-072918-2896 |
| 3817 | CTGTAAGGCTACCATCTTTAAAGTTTTC | 7236-074233-4206 |
| 3825 | GTCTGGATACTCTAACTCGATG | ST82782-2761 |
| 3826 | CTAATGTTGGCATAACTTCCTC | ST85090-5069 |
| 3827 | CCATAAGAACCGTATTTGTTTACTG | ST85733-5709 |
| 3828 | GCAAAACTTTTGTCATCTAAATTTCC | ST88141-8116 |
| 3829 | CTCCAGCCATTGTCAAATGC | ST88762-8743 |
| 3830 | CAAATAATCTTATAGAAAATTTATTTTGCGG | ST811426-11396 |
| 3831 | CAAAAATTACTATAGATACTAGTAGAGC | ST812023-11996 |
| 3832 | TTCTCAGTATAGACCGCTTCTAAC | ST813900-13877 |
| cpsA-R | GAATATTTTCATTATCAGTCCCAGTC | [[2](#_ENREF_2)] |

aUnderlined base indicates departure from reference sequence

bNucleotide references correspond to GenBank accession Nos. AJ239004 (ST8) or KJ363164 (7236-07)

**References**

1. Bratcher PE, Park IH, Hollingshead SK, Nahm MH (2009) Production of a unique pneumococcal capsule serotype belonging to serogroup 6. Microbiology 155: 576-583.

2. Pai R, Gertz RE, Beall B (2006) Sequential multiplex PCR approach for determining capsular serotypes of *Streptococcus pneumoniae* isolates. J Clin Microbiol 44: 124-131.

3. Hathaway LJ, Stutzmann Meier P, Battig P, Aebi S, Muhlemann K (2004) A homologue of *aliB* is found in the capsule region of nonencapsulated *Streptococcus pneumoniae*. J Bacteriol 186: 3721-3729.

4. Yu J, Lin J, Benjamin WH, Jr., Waites KB, Lee CH, et al. (2005) Rapid multiplex assay for serotyping pneumococci with monoclonal and polyclonal antibodies. J Clin Microbiol 43: 156-162.
